# Supplementary material for: Synergic effects between ocellatin-F1 and bufotenine on the inhibition of BHK-21 cellular infection by the rabies virus
Source: PubMed Central journal article supplement (PMC4668702; doi:10.1186/s40409-015-0048-1), 2015-12-02
Supplement: 40409_2015_48_MOESM1_ESM.pdf [file 40409_2015_48_MOESM1_ESM.pdf]

## Additional file 1

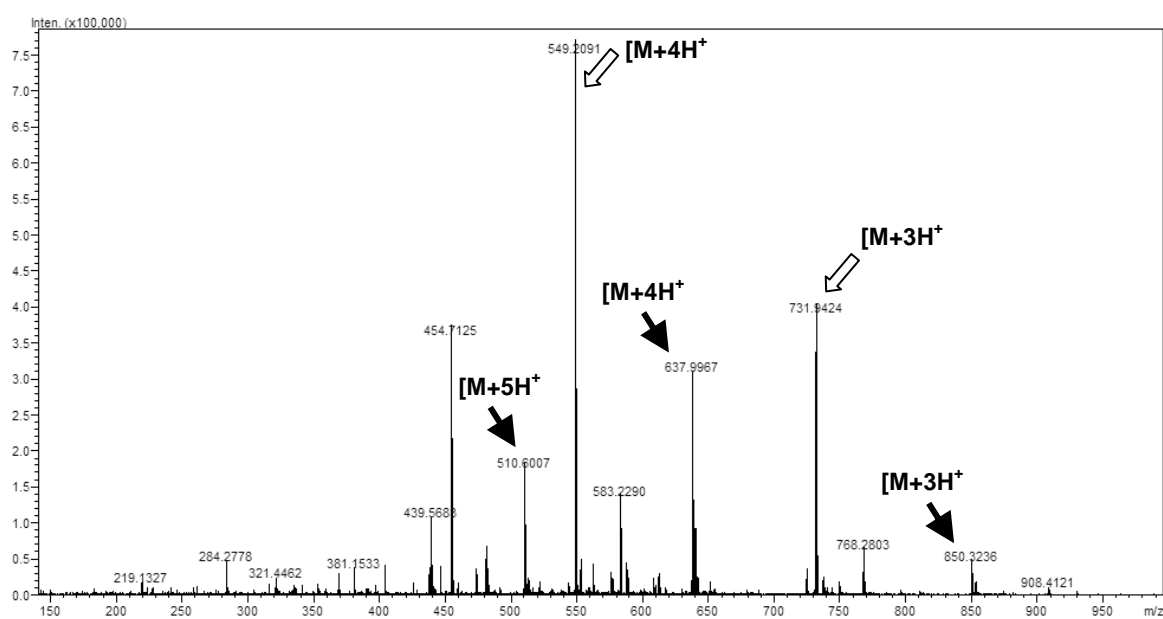

**Figure S1.** Mass spectrometry profile of the active fraction (F11) of *L. labyrinthicus* skin secretion. Left black arrows indicate the charge states of the 2547.99 Da molecule and right white arrows indicate the charge states the 2192.81 Da peptide.
