# Supplementary material for: Synergic effects between ocellatin-F1 and bufotenine on the inhibition of BHK-21 cellular infection by the rabies virus
Source: PubMed Central journal article supplement (PMC4668702; doi:10.1186/s40409-015-0048-1), 2015-12-02
Supplement: 40409_2015_48_MOESM2_ESM.pdf [file 40409_2015_48_MOESM2_ESM.pdf]

Additional file 2

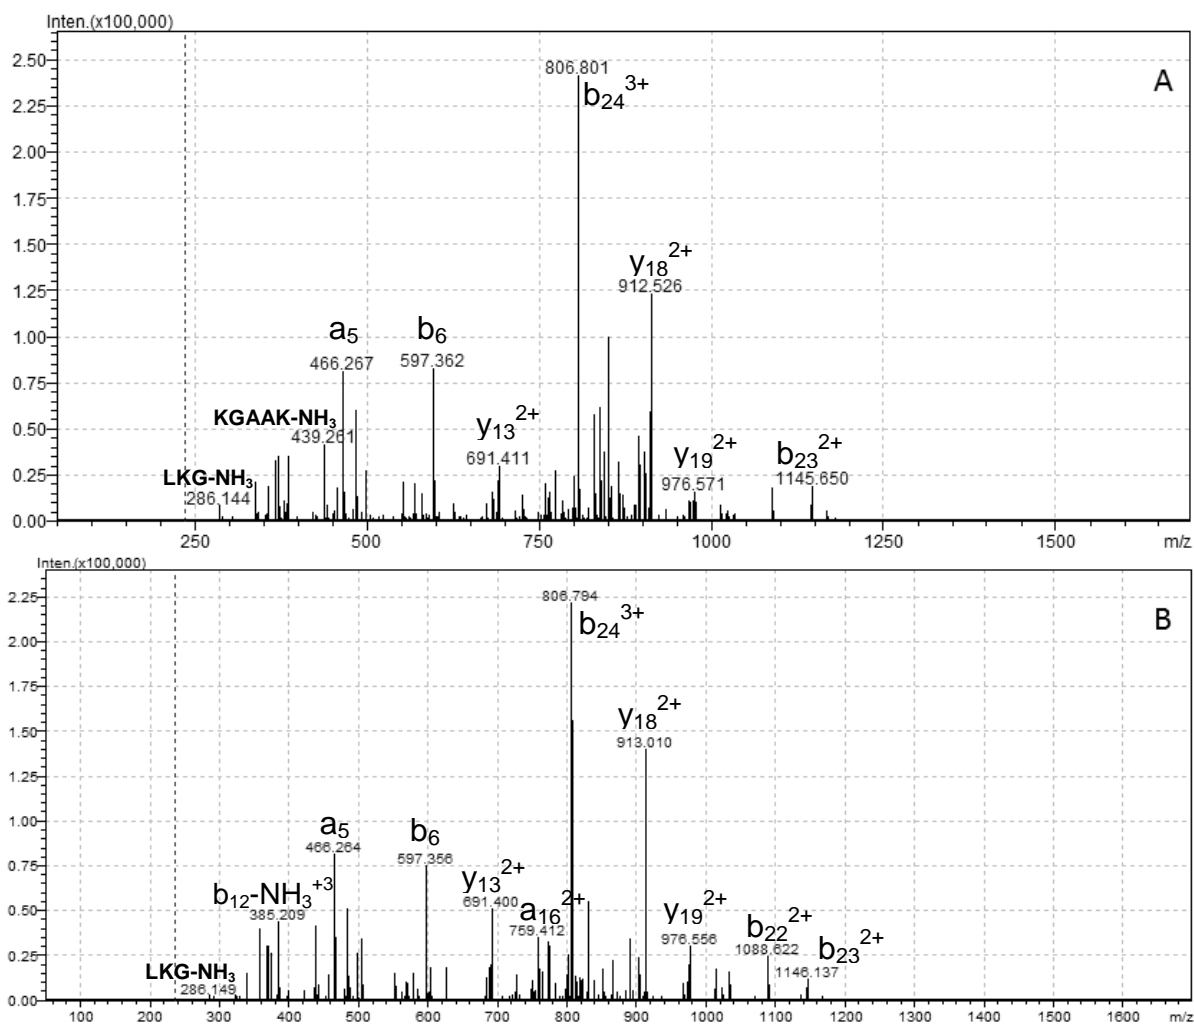

**Figure S2.** CID MS2 fragmentation spectra of **(A)** m/z=850.16 [M+3H]<sup>3+</sup> present in F11 and **(B)** the triply charged precursor of synthetic ocellatin-F1 (OF1) (m/z=850.25). The most evident peaks are annotated according to the fragmentation pattern.
