# Supplementary material for: Synergic effects between ocellatin-F1 and bufotenine on the inhibition of BHK-21 cellular infection by the rabies virus
Source: PubMed Central journal article supplement (PMC4668702; doi:10.1186/s40409-015-0048-1), 2015-12-02
Supplement: 40409_2015_48_MOESM4_ESM.pdf [file 40409_2015_48_MOESM4_ESM.pdf]

#### Additional file 4

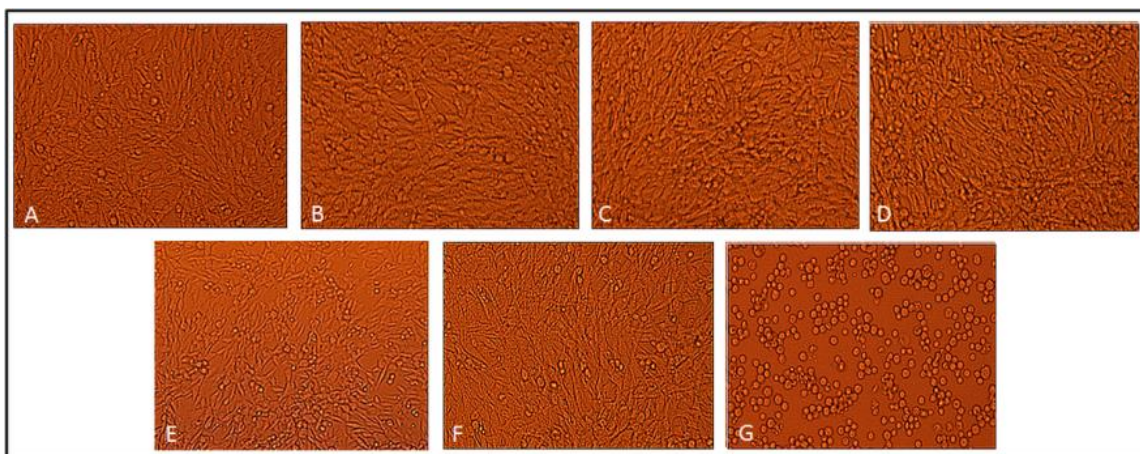

**Figure S4.** Evaluation of cytotoxicity of different molecules in BHK-21 cell line after treatment with: (A) F11 (1 mg.mL<sup>-1</sup>); (B) OF1 (1 mg.mL<sup>-1</sup>); (C) OF1TP (6 mg.mL<sup>-1</sup>); (D) RGVTP (6 mg.mL<sup>-1</sup>) and (E) bufotenine (0.8 mg.mL<sup>-1</sup>). (F) negative control (MEM-FBS only) and (G) positive control (DMSO (1:5) only). Magnification 100x.
