# Supplementary material for: Synergic effects between ocellatin-F1 and bufotenine on the inhibition of BHK-21 cellular infection by the rabies virus
Source: J Venom Anim Toxins Incl Trop Dis. 2015 Dec 2;21:50. doi: 10.1186/s40409-015-0048-1 (PMC4668702; doi:10.1186/s40409-015-0048-1)
Supplement: Additional file 3: — Figure showing direct immunofluorescence (DIF) of BHK-21 cell monolayer after treatment with RABV and: ( A ) 4 mg.mL −1 synthetic ocellatin-F1 tetrapeptide (OF1TP); ( B ) 4 mg.mL −1 synthetic rabies virus glycoprotein G tetrapeptide (RVGTP); ( C ) negative control (MEM-FBS only) and ( D ) positive control (PV only). Magnification 200 × . (PDF 35 kb) [file 40409_2015_48_MOESM3_ESM.pdf]

### Additional file 3

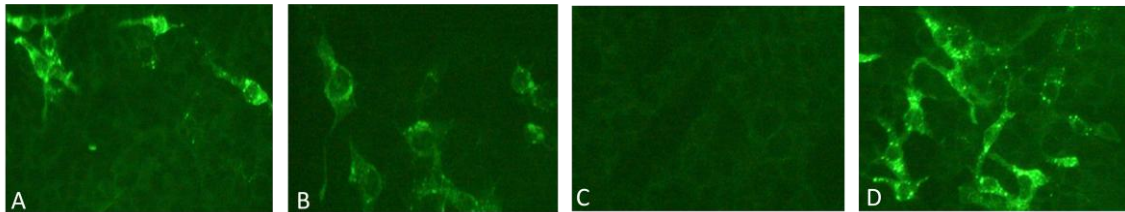

**Figure S3.** Figure showing direct immunofluorescence (DIF) of BHK-21 cell monolayer after treatment with RABV and: (A) 4 mg.mL<sup>-1</sup> synthetic ocellatin-F1 tetrapeptide (OF1TP); (B) 4mg.mL<sup>-1</sup> synthetic rabies virus glycoprotein G tetrapeptide (RVGTP); (C) negative control (MEM-FBS only) and (D) positive control control (PV only). Magnification 200x.
